# Supplementary material for: Diet Quality and Satisfaction with Life, Family Life, and Food-Related Life across Families: A Cross-Sectional Pilot Study with Mother-Father-Adolescent Triads
Source: MDPI journal article supplement (doi:10.3390/ijerph14111313), 2017-10-29
Supplement: s1 [file s1]

Table S1: Frequency of consumption of the foods considered by the AHEI with statistical differences among mothers in all three clusters.

| Food                                      | Group 1<br>(n = 118) | Group 2<br>(n = 43) | Group 3<br>(n = 139) |
|-------------------------------------------|----------------------|---------------------|----------------------|
| <i>Cereals and derivatives</i>            |                      | <i>P</i> = 0.000    |                      |
| Daily consumption                         | 7.6                  | 46.5                | 23.0                 |
| Three or more times a week, but not daily | 22.0                 | 23.3                | 19.4                 |
| Once or twice a week                      | 28.0                 | 23.3                | 35.3                 |
| Less than once a week                     | 19.5                 | 2.3                 | 5.8                  |
| Never or almost never                     | 22.9                 | 4.7                 | 16.5                 |
| <i>Vegetables</i>                         |                      | <i>P</i> = 0.000    |                      |
| Daily consumption                         | 39.8                 | 88.4                | 65.5                 |
| Three or more times a week, but not daily | 40.7                 | 11.6                | 24.5                 |
| Once or twice a week                      | 16.1                 | 0.0                 | 9.4                  |
| Less than once a week                     | 34                   | 0.0                 | 0.7                  |
| <i>Fruit</i>                              |                      | <i>P</i> = 0.000    |                      |
| Daily consumption                         | 28.0                 | 76.7                | 50.4                 |
| Three or more times a week, but not daily | 35.6                 | 16.3                | 30.2                 |
| Once or twice a week                      | 22.9                 | 4.7                 | 15.1                 |
| Less than once a week                     | 11.9                 | 2.3                 | 2.2                  |
| Never or almost never                     | 1.7                  | 0.0                 | 2.2                  |
| <i>Milk and dairy products</i>            |                      | <i>P</i> = 0.000    |                      |
| Daily consumption                         | 25.4                 | 74.4                | 30.9                 |
| Three or more times a week, but not daily | 27.1                 | 11.6                | 33.8                 |
| Once or twice a week                      | 28.8                 | 14.0                | 18.7                 |
| Less than once a week                     | 11.9                 | 0.0                 | 8.6                  |
| Never or almost never                     | 6.8                  | 0.0                 | 1.0                  |
| <i>Meats</i>                              |                      | <i>P</i> = 0.012    |                      |
| Daily consumption                         | 22.0                 | 9.3                 | 9.4                  |
| Three or more times a week, but not daily | 44.9                 | 41.9                | 42.4                 |
| Once or twice a week                      | 22.9                 | 46.5                | 34.5                 |
| Less than once a week                     | 7.6                  | 2.3                 | 12.2                 |
| Never or almost never                     | 2.5                  | 0.0                 | 1.4                  |
| <i>Sausages and cold meats</i>            |                      | <i>P</i> = 0.000    |                      |
| Daily consumption                         | 22.0                 | 7.0                 | 6.5                  |
| Three or more times a week, but not daily | 25.4                 | 7.0                 | 23.0                 |
| Once or twice a week                      | 23.7                 | 20.9                | 23.0                 |
| Less than once a week                     | 13.6                 | 37.2                | 25.9                 |
| Never or almost never                     | 15.3                 | 27.9                | 21.6                 |
| <i>Sweets</i>                             |                      | <i>P</i> = 0.000    |                      |
| Daily consumption                         | 11.0                 | 0.0                 | 6.5                  |
| Three or more times a week, but not daily | 24.6                 | 16.3                | 15.1                 |
| Once or twice a week                      | 29.7                 | 7.0                 | 27.3                 |

|                                           |      |                  |      |
|-------------------------------------------|------|------------------|------|
| Less than once a week                     | 15.3 | 41.9             | 22.3 |
| Never or almost never                     | 19.5 | 34.9             | 28.8 |
| <i>Soft drinks with sugar</i>             |      | <i>P = 0.000</i> |      |
| Daily consumption                         | 39.8 | 2.3              | 13.7 |
| Three or more times a week, but not daily | 16.9 | 2.3              | 15.1 |
| Once or twice a week                      | 11.9 | 14.0             | 25.9 |
| Less than once a week                     | 12.7 | 20.9             | 18.7 |
| Never or almost never                     | 18.6 | 60.5             | 26.6 |

Table S2: Frequency of consumption of the foods considered by the AHEI with statistical differences among fathers in all three clusters.

| Food                                      | Group 1<br>(n = 118) | Group 2<br>(n = 43) | Group 3<br>(n = 139) |
|-------------------------------------------|----------------------|---------------------|----------------------|
| <i>Cereals and derivatives</i>            |                      | <i>P = 0.001</i>    |                      |
| Daily consumption                         | 7.6                  | 34.9                | 17.3                 |
| Three or more times a week, but not daily | 23.7                 | 27.9                | 15.1                 |
| Once or twice a week                      | 21.2                 | 18.6                | 23.7                 |
| Less than once a week                     | 17.8                 | 7.0                 | 12.2                 |
| Never or almost never                     | 29.7                 | 11.6                | 31.7                 |
| <i>Vegetables</i>                         |                      | <i>P = 0.012</i>    |                      |
| Daily consumption                         | 38.1                 | 69.8                | 53.2                 |
| Three or more times a week, but not daily | 36.4                 | 27.9                | 28.1                 |
| Once or twice a week                      | 19.5                 | 2.3                 | 16.5                 |
| Less than once a week                     | 5.1                  | 0.0                 | 2.2                  |
| Never or almost never                     | 0.8                  | 0.0                 | 0.0                  |
| <i>Fruit</i>                              |                      | <i>P = 0.000</i>    |                      |
| Daily consumption                         | 17.8                 | 51.2                | 26.8                 |
| Three or more times a week, but not daily | 33.9                 | 27.9                | 44.9                 |
| Once or twice a week                      | 30.5                 | 16.3                | 16.7                 |
| Less than once a week                     | 13.6                 | 4.7                 | 8.0                  |
| Never or almost never                     | 4.2                  | 0.0                 | 3.6                  |
| <i>Milk and dairy products</i>            |                      | <i>P = 0.018</i>    |                      |
| Daily consumption                         | 16.9                 | 37.2                | 34.5                 |
| Three or more times a week, but not daily | 21.2                 | 27.9                | 22.3                 |
| Once or twice a week                      | 33.1                 | 18.6                | 20.9                 |
| Less than once a week                     | 17.8                 | 14.0                | 11.5                 |
| Never or almost never                     | 11.0                 | 2.3                 | 10.8                 |
| <i>Sausages and cold meats</i>            |                      | <i>P = 0.005</i>    |                      |
| Daily consumption                         | 28.0                 | 11.6                | 13.7                 |
| Three or more times a week, but not daily | 21.2                 | 11.6                | 29.5                 |
| Once or twice a week                      | 26.3                 | 23.3                | 23.0                 |
| Less than once a week                     | 15.3                 | 34.9                | 23.7                 |
| Never or almost never                     | 9.3                  | 18.6                | 10.1                 |

|                                           |      |                  |      |
|-------------------------------------------|------|------------------|------|
| <i>Soft drinks with sugar</i>             |      | <i>P = 0.000</i> |      |
| Daily consumption                         | 45.8 | 4.7              | 22.3 |
| Three or more times a week, but not daily | 20.3 | 14.0             | 23.0 |
| Once or twice a week                      | 16.9 | 9.3              | 15.8 |
| Less than once a week                     | 8.5  | 18.6             | 21.6 |
| Never or almost never                     | 8.5  | 53.5             | 17.3 |

P value corresponds to the (bilateral) asymptotic significance obtained in Pearson's Chi squared Test

Table S3: Frequency of consumption of the foods considered by the AHEI with statistical differences among children in all three clusters.

| Food                                      | Group 1<br>(n = 118) | Group 2<br>(n = 43) | Group 3<br>(n = 139) |
|-------------------------------------------|----------------------|---------------------|----------------------|
| <i>Cereals and derivatives</i>            |                      | <i>P = 0.000</i>    |                      |
| Daily consumption                         | 13.6                 | 58.1                | 33.8                 |
| Three or more times a week, but not daily | 22.0                 | 30.2                | 29.5                 |
| Once or twice a week                      | 33.9                 | 4.7                 | 29.5                 |
| Less than once a week                     | 10.2                 | 0.2                 | 5.8                  |
| Never or almost never                     | 20.3                 | 7.0                 | 7.2                  |
| <i>Vegetables</i>                         |                      | <i>P = 0.000</i>    |                      |
| Daily consumption                         | 22.0                 | 76.7                | 50.4                 |
| Three or more times a week, but not daily | 37.3                 | 18.0                | 34.5                 |
| Once or twice a week                      | 26.3                 | 4.0                 | 13.7                 |
| Less than once a week                     | 5.9                  | 0.7                 | 0.7                  |
| Never or almost never                     | 8.5                  | 0.6                 | 0.7                  |
| <i>Fruit</i>                              |                      | <i>P = 0.000</i>    |                      |
| Daily consumption                         | 13.6                 | 81.4                | 43.2                 |
| Three or more times a week, but not daily | 24.6                 | 11.6                | 36.8                 |
| Once or twice a week                      | 42.4                 | 4.7                 | 14.4                 |
| Less than once a week                     | 15.3                 | 2.0                 | 2.9                  |
| Never or almost never                     | 4.2                  | 0.3                 | 0.7                  |
| <i>Milk and dairy products</i>            |                      | <i>P = 0.000</i>    |                      |
| Daily consumption                         | 29.7                 | 83.7                | 74.8                 |
| Three or more times a week, but not daily | 24.6                 | 11.6                | 14.4                 |
| Once or twice a week                      | 22.9                 | 2.3                 | 8.0                  |
| Less than once a week                     | 12.7                 | 2.0                 | 2.2                  |
| Never or almost never                     | 4.4                  | 0.3                 | 0.6                  |
| <i>Sausages and cold meats</i>            |                      | <i>P = 0.000</i>    |                      |
| Daily consumption                         | 16.1                 | 4.7                 | 6.5                  |
| Three or more times a week, but not daily | 31.4                 | 11.6                | 29.5                 |
| Once or twice a week                      | 23.7                 | 18.6                | 33.1                 |
| Less than once a week                     | 19.5                 | 25.6                | 16.5                 |
| Never or almost never                     | 9.3                  | 39.5                | 14.4                 |

|                                           |      |                  |      |
|-------------------------------------------|------|------------------|------|
| <i>Sweets</i>                             |      | <i>P</i> = 0.000 |      |
| Daily consumption                         | 26.3 | 4.7              | 15.8 |
| Three or more times a week, but not daily | 28.8 | 16.3             | 25.9 |
| Once or twice a week                      | 28.0 | 9.3              | 26.5 |
| Less than once a week                     | 11.0 | 32.6             | 19.4 |
| Never or almost never                     | 5.9  | 37.2             | 12.2 |
| <i>Soft drinks with sugar</i>             |      | <i>P</i> = 0.000 |      |
| Daily consumption                         | 47.5 | 7.0              | 23.0 |
| Three or more times a week, but not daily | 22.9 | 2.3              | 24.5 |
| Once or twice a week                      | 16.9 | 20.9             | 21.6 |
| Less than once a week                     | 9.3  | 20.9             | 17.3 |
| Never or almost never                     | 3.4  | 48.8             | 13.7 |

---

P value corresponds to the (bilateral) asymptotic significance obtained in Pearson's Chi squared Test
